# Supplementary material for: Orientational variation, solvate composition and molecular flexibility in well-ordered cocrystals of the fullerene C70 with bis(ethylenedithio)tetrathiafulvalene
Source: Royal Society of Chemistry journal article supplement (doi:10.1039/c3cc46367b), 2013-01-01
Supplement: c3cc46367b.pdf [file c3cc46367b.pdf]

## Supporting Information for

### **Orientational Variation, Solvate Composition and Molecular Flexibility in Well-Ordered Cocrystals of the Fullerene C<sub>70</sub> with Bis(ethylenedithio)tetrathiafulvalene<sup>†</sup>**

Kamran B. Ghiassi, Marilyn M. Olmstead and Alan L. Balch

Packing Diagrams for 2C<sub>70</sub> • 2ET • CS<sub>2</sub> and C<sub>70</sub> • ET • C<sub>6</sub>H<sub>6</sub>

Figure S2.  $2C_{70} \cdot 2ET \cdot CS_2$  packing diagrams

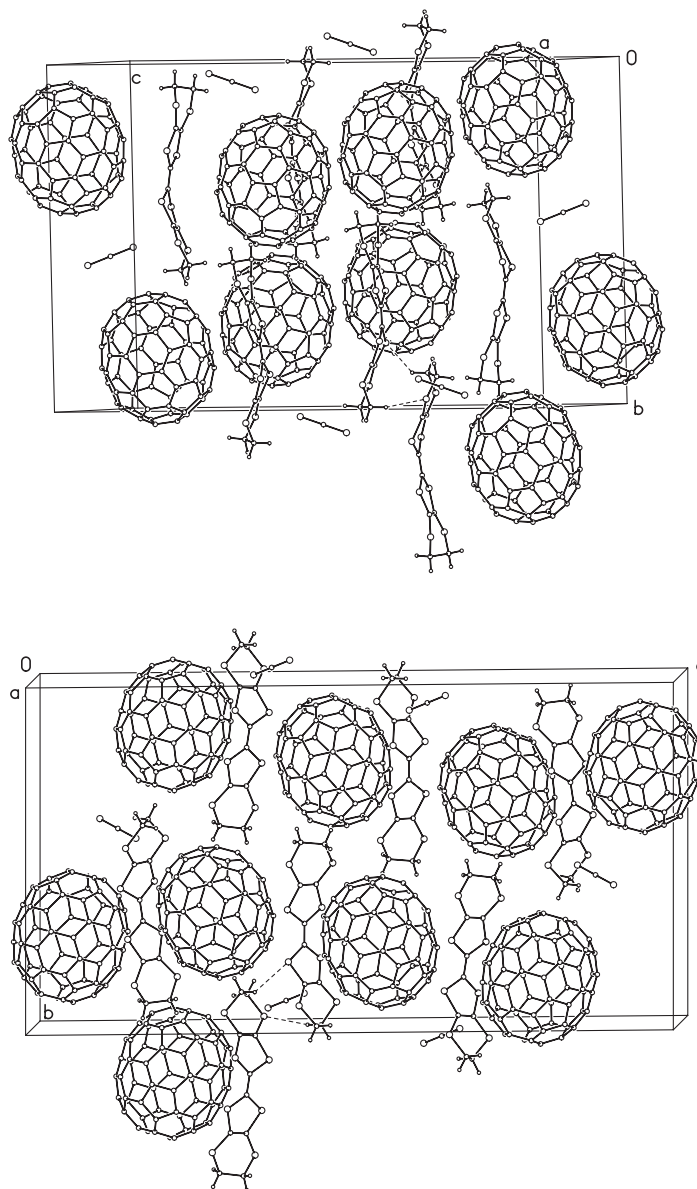

View down a

Figure S1.  $C_{70} \cdot ET \cdot C_6H_6$  packing diagrams

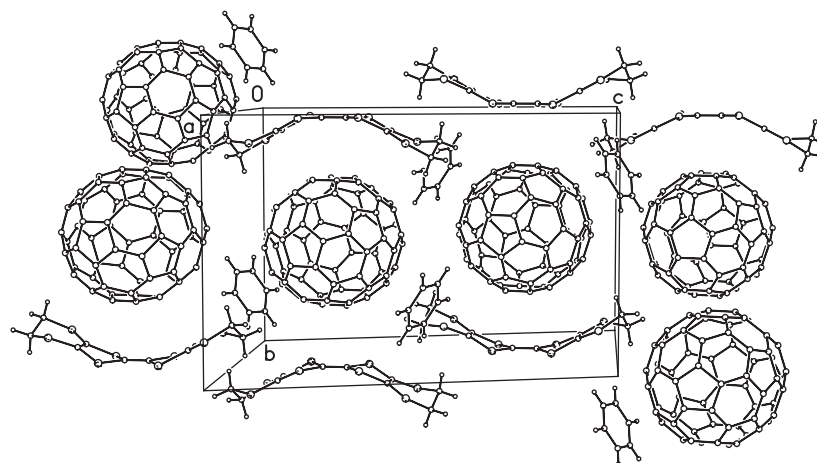

View down a

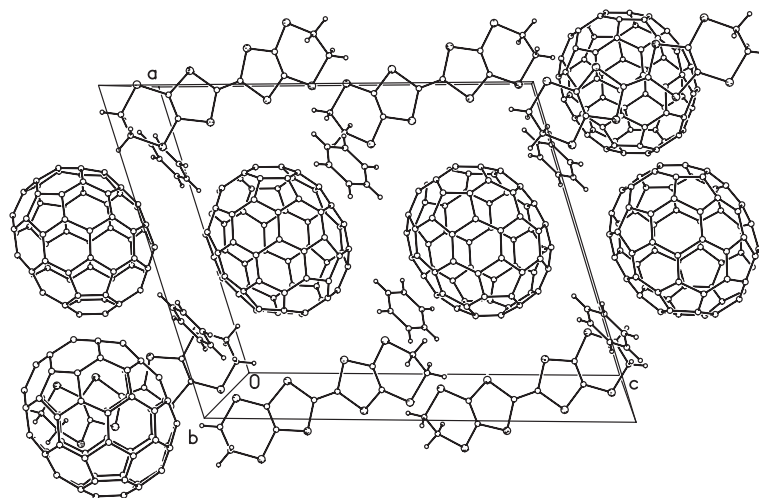

View down b
